# Supplementary material for: Pro-inflammatory effect of obesity on rats with burn wounds
Source: PeerJ. 2020 Dec 8;8:e10499. doi: 10.7717/peerj.10499 (PMC7731656; doi:10.7717/peerj.10499)
Supplement: Supplemental Information 1 [file peerj-08-10499-s001.xlsx]

## Sheet: Sheet1
NO	MCP-1	IL-1β	TNF-α	MCP-1-PCR	IL-1β-PCR	TNF-α-PCR	VEGF-PCR	Weight	Weight-before	Lees index	Day	Degree of Burn (1: control; 2: second degree; 3: third degree)	Degree of Obesity (1: normal; 2: overweight; 3: obese)
1	65.98	6.56	48.78	218.94	16.12	2.41	1.01	544.9	560.56	323.3	1	2	3
2	61.59	3.5	27.34	139.96	24.7	2.78	1.26	494.99	507.02	316.4	1	2	3
3	63.59	4.78	19.73	129.01	35.4	3.62	0.73	474.2	474.2	311.9	1	2	3
4	63.4	3.79	23.23	156.07	14.22	3.88	1.49	517.81	517.91	314.9	1	2	3
5	95.09	4.16	15.29	222.43	31.63	3.33	0.99	472.4	483.6	320.4	1	2	3
6	72.38	8.85	43.15	45.56	142.99	10.07	1.59	490.54	493.7	315	3	2	3
7	103.39	4.82	28.24	11.93	70.93	6.63	0.57	517.49	535.8	303	3	2	3
8	78.24	8.13	21.84	27.96	38.89	43.88	1.14	488.83	514.7	304.5	3	2	3
9	76.35	3.77	9.5	7.46	12.54	2.51	0.32	467.97	497.3	319.1	3	2	3
10	89.16	4.6	16.32	18.25	60.97	7.54	0.88	501.28	497.9	308.8	3	2	3
11	66.51	7.3	39.41	8.6	214.52	33.24	1.06	441.4	450.19	298.2	7	2	3
12	79.45	6.56	37.3	13.27	216.03	25.48	1.98	515.2	572.75	319.4	7	2	3
13	77.02	4.81	33.35	8.63	213.35	91.97	1.05	469.1	490.4	303.3	7	2	3
14	70.66	4.15	30.23	28.8	117.66	17.13	1.39	494.8	510.44	313.4	7	2	3
15	164	12.32	85.33	8.46	207.94	33.71	1.07	580.6	591.59	322.9	7	2	3
16	92.24	3.83	12.4	5.48	81.62	3.47	5.04	470.61	491.83	315.7	14	2	3
17	101.43	7.67	104.76	19.23	99.73	13.09	2.51	497.45	497.19	316.9	14	2	3
18	61.59	3.79	26.58	157.12	570.68	55.12	4.16	482.18	466.92	323.2	14	2	3
19	114.06	3.79	25.26	28.76	257.72	46.03	2.73	598.54	613.04	326.7	14	2	3
20	92.35	4.78	42.31	11.39	93.38	9.78	2.47	512.12	517.25	321.1	14	2	3
21	103.15	4.95	21.77	594.87	106.08	12.28	0.47	474.81	488.8	303	1	3	3
22	110.27	4.77	31.31	402.21	18.69	15.33	0.46	477.01	482.4	313.7	1	3	3
23	94.14	4.47	11.21	487.75	24.85	13.27	0.53	490.68	503.6	318.2	1	3	3
24	49.45	4.45	42.45	377.41	22.16	5.46	1.06	492.34	499.8	330.7	1	3	3
25	56.39	7.67	41.87	540.98	27.84	3.75	1.73	499.73	505.7	325.2	1	3	3
26	134.29	17.42	51.08	116.53	195.65	24.2	0.77	496.15	488.58	329.3	3	3	3
27	69.71	3.71	35.07	94.68	179.77	23.59	1.18	456.45	434.45	338.4	3	3	3
28	68.85	4.07	28.71	134.83	199.47	55.33	1.79	457.75	451.7	308.2	3	3	3
29	60.53	2.81	25.82	98.46	189.7	25.32	1.85	475.09	507.72	310.7	3	3	3
30	96.08	6.5	43.47	146.08	205.1	94.65	1.84	435.32	460.15	310.8	3	3	3
31	62.78	6.89	26.52	8.45	272.97	16.94	1.1	482.46	493.5	329.3	7	3	3
32	79.04	7.8	45.73	8.37	200.16	27.1	1.66	505.02	516.9	334.4	7	3	3
33	82.51	7.3	39.41	6.95	160.26	50.63	1.9	494.51	492.1	315.8	7	3	3
34	112.17	5.04	27.05	7.65	199.47	17.63	1.68	496.22	499.8	317.4	7	3	3
35	82.75	4.29	13.42	9.55	248.14	17.33	1.27	471.63	486.5	314.6	7	3	3
36	82.46	6.32	38.45	49.71	230.76	12.25	1.67	526.1	531.8	300.1	14	3	3
37	54.78	4.27	26.35	40.89	104.5	5.17	1.39	493.5	513.8	308.1	14	3	3
38	61.89	4.84	26.28	49.43	402.04	56.93	2.89	497.6	520.8	309.4	14	3	3
39	67.72	5.07	32.75	71.98	497.23	26.1	2.38	491.3	503.7	318.3	14	3	3
40	53.19	5.73	34.25	44.12	228.33	43.81	1.98	494.6	512.8	307.9	14	3	3
41	76.51	8.25	39.17	1	1	1	1	495.2	523.6	322.4	1	1	3
42	106.95	4.49	17.17	1	1	1	1	459.2	468.8	310.7	1	1	3
43	78.24	5.89	50.18	1	1	1	1	454.7	462.2	309.3	1	1	3
44	87.47	7.16	36.72	1	1	1	1	447.8	460.17	302.8	1	1	3
45	87.16	5.35	34.85	1	1	1	1	441.4	455.8	296	1	1	3
46	70.25	9	41.98	1	1	1	1	455.4	483.2	301.8	3	1	3
47	134.75	14.13	78.29	1	1	1	1	439.68	466.8	310.3	3	1	3
48	84.93	1.63	23.84	1	1	1	1	451.5	472.6	311.6	3	1	3
49	96.55	5.25	48.05	1	1	1	1	460.99	452.56	301.1	3	1	3
50	96.75	5.5	48.1	1	1	1	1	461.4	480.1	307.1	3	1	3
51	81.56	4.85	34.95	1	1	1	1	435.98	523.34	335.8	7	1	3
52	85.86	3.27	20.64	1	1	1	1	437.98	466.5	301.8	7	1	3
53	82.12	5.89	36.13	1	1	1	1	447.05	501.3	317.8	7	1	3
54	93.06	5.64	29.02	1	1	1	1	476.8	488.3	315	7	1	3
55	75.23	3.7	27.34	1	1	1	1	457.59	466.1	298.2	7	1	3
56	85.19	4.78	26.29	1	1	1	1	573.97	586.2	304.3	14	1	3
57	94.61	4.85	10.18	1	1	1	1	477.16	476.5	300.4	14	1	3
58	95.54	13.47	68.45	1	1	1	1	481.88	487.4	321.2	14	1	3
59	90.71	8.46	36.6	1	1	1	1	462.5	469.3	310.8	14	1	3
60	86.43	5.79	33.43	1	1	1	1	470.6	476.1	300.3	14	1	3
61	64.73	3.52	12.44	6.68	3.3	0.97	0.49	418.8	432.49	302.5	1	2	2
62	85.6	5.04	14.27	7.27	0.14	1.24	0.06	432.9	444.31	299.2	1	2	2
63	90.34	4.58	17.59	9.08	12.84	1.67	0.64	472.6	486.8	308.5	1	2	2
64	106.95	4.49	20.06	6.49	9.37	2.18	1.52	457.7	476.84	300.5	1	2	2
65	98.41	4.44	13.76	8.28	2.04	1.61	1.9	461.3	472.29	299.5	1	2	2
66	59.58	8.46	27.23	3.86	2.04	0.69	1.05	446.28	462.96	309.4	3	2	2
67	80.38	5.87	29.33	3.46	2.03	0.48	1.46	434.03	455.28	320.5	3	2	2
68	152.01	6.07	28.24	3.42	1.96	0.47	1.39	453.51	465.73	298.1	3	2	2
69	69.95	3.89	16.66	11.23	20.61	1.94	1.64	418.57	437.17	309.8	3	2	2
70	120.23	5.04	30.28	3.27	0.39	0.45	1.04	418.58	446.43	299.7	3	2	2
71	79.74	4.17	30.69	37.92	35.01	27.29	3.38	463.01	479.34	313	7	2	2
72	56.75	1.22	22.17	15.14	17.09	24.11	4.39	487.17	467.41	310.4	7	2	2
73	71.57	2.45	33.73	22.62	18.73	30.76	2.43	475.46	487.3	314.8	7	2	2
74	63.71	4.38	32.52	32.86	20.58	22.92	3.23	468.04	480.61	313.3	7	2	2
75	61.72	6.31	36.83	17.09	12.17	28.34	2.38	454.67	491.86	315.7	7	2	2
76	63.85	8.58	34.25	25.41	35.31	1.91	1.33	435.74	464.97	303.8	14	2	2
77	55.46	4.02	25.71	11.86	116.69	8.88	1.58	494.75	502.42	294.4	14	2	2
78	45.72	6.47	25.82	14.19	146.35	7.04	0.96	437.09	455.38	307.7	14	2	2
79	80.38	5.54	17.68	23.75	116.97	11.92	1.31	438.89	450.93	294.9	14	2	2
80	87.97	3.76	20.34	20.13	184.13	38.04	1.13	444.86	454.5	307.5	14	2	2
81	94.54	5.39	26.71	1.53	0.74	0.29	0.63	472.98	461.6	322	1	3	2
82	81.33	4.99	26.37	0.71	1.54	0.09	0.56	401.82	414.2	298.2	1	3	2
83	63.3	5.1	16.83	0.12	0.48	0.03	0.28	463.33	468.2	323.5	1	3	2
84	75.58	7.98	38.7	2.94	1.42	0.11	0.85	445.48	460.7	321.8	1	3	2
85	87.84	9.78	39.64	0.87	0.63	0.08	0.86	438.99	440.1	316.9	1	3	2
86	104.54	5.95	41.98	1.11	0.84	0.03	0.9	433.46	474.1	299.9	3	3	2
87	103.94	20.3	75.71	1.2	1.05	0.04	1.06	437.17	477.8	325.7	3	3	2
88	89.4	5.94	16.83	1.59	1.2	0.07	1.14	412.39	445.4	305.5	3	3	2
89	89.87	4.55	16.15	1.21	1.06	0.05	0.94	431.76	464.8	322.8	3	3	2
90	96.95	9.19	37.67	2.01	1.51	0.13	0.64	429.78	471.5	299.4	3	3	2
91	86.77	8.75	16.92	14.82	7.95	2.05	3.03	408.4	430.89	314.7	7	3	2
92	92.45	7.57	52.09	15.58	11.47	10.36	4.01	456.24	470.8	311.2	7	3	2
93	113.11	5.39	30.28	5.32	1.37	1.16	1.45	453.46	460.3	321.7	7	3	2
94	90.34	6.51	30.27	11.59	3.59	4.18	3.34	455.04	453.7	320.2	7	3	2
95	99.36	5.66	29.35	7.98	1.73	12.15	2.35	460.08	456.1	307.9	7	3	2
96	55.46	4.02	25.71	31.57	111.36	6.35	1.96	432.5	449.3	306.4	14	3	2
97	45.72	6.47	25.82	58.08	296.08	29.72	3.52	414.7	446.8	305.8	14	3	2
98	80.38	5.54	17.68	45.38	266.95	14.5	1.85	421.01	452.5	326.7	14	3	2
99	87.97	3.76	20.34	43.71	159.23	13.74	1.03	425.8	465.8	316.4	14	3	2
100	55.46	4.95	22.39	50.56	182.28	21.33	1.3	450.6	466.1	298.2	14	3	2
101	85.67	5.21	26.54	1	1	1	1	422.1	441.97	304.7	1	1	2
102	89.87	4.55	27.2	1	1	1	1	447.8	460.17	302.8	1	1	2
103	87.18	5.23	26.55	1	1	1	1	417.4	427.45	301.3	1	1	2
104	84.65	3.23	13.42	1	1	1	1	411.9	437.59	303.7	1	1	2
105	88.54	7.9	40.68	1	1	1	1	441.4	455.8	296	1	1	2
106	95.81	5.96	27.56	1	1	1	1	428.08	433	315.2	3	1	2
107	110.27	4.84	11.21	1	1	1	1	421.99	427.39	301.3	3	1	2
108	78.48	4.29	9.33	1	1	1	1	430.99	452.56	301.1	3	1	2
109	69.95	3.3	1.67	1	1	1	1	434.71	454.41	295.7	3	1	2
110	88.64	4.6	12.44	1	1	1	1	421.4	445.8	305.6	3	1	2
111	87.32	6.97	47.84	1	1	1	1	416.8	426.94	301.2	7	1	2
112	66.43	5.79	33.43	1	1	1	1	422.8	426.74	307.3	7	1	2
113	114.06	5.43	29.59	1	1	1	1	446.8	428.3	314.1	7	1	2
114	55.23	3.2	27.34	1	1	1	1	431.8	426.51	313.6	7	1	2
115	80.76	5.35	29.53	1	1	1	1	418.9	433.22	291	7	1	2
116	82.51	7.9	38.24	1	1	1	1	426	401.53	307.4	14	1	2
117	95.09	4.16	15.29	1	1	1	1	435.1	415.75	311	14	1	2
118	52.12	5.31	38	1	1	1	1	435.98	436	309.6	14	1	2
119	104.58	5.13	21.51	1	1	1	1	426.4	418.03	311.5	14	1	2
120	77.71	8.46	36.6	1	1	1	1	431.8	410.35	315.9	14	1	2
121	55.62	22.2	32.38	0.12	1.3	0.07	0.5	423.31	401.4	307.4	1	2	1
122	56.39	6.35	33.55	0.25	1.31	0.13	0.53	405.8	396.7	306.2	1	2	1
123	64.92	4.38	31.45	0.82	1.65	0.14	0.53	402.7	398.5	334.5	1	2	1
124	63.89	3.25	27.49	0.01	0.84	0.06	0.42	381.7	367.9	298.6	1	2	1
125	57.35	3.5	23.69	0.4	0.86	0.14	0.6	348.5	333.8	308.3	1	2	1
126	60.38	4.35	28.56	5.93	25.73	0.62	6.77	419.02	419	325.3	3	2	1
127	77.18	7.09	35.89	5.3	21.19	0.47	4.69	339.65	332.6	314.9	3	2	1
128	56.75	2.68	22.47	4.35	15.3	0.33	2.43	392.46	392.8	305.1	3	2	1
129	54.02	3.81	25.06	8.31	40.22	0.7	7.97	432.6	416.5	298.7	3	2	1
130	67.34	3.02	28.56	6.5	35.26	0.65	7.21	361.79	350.8	306.6	3	2	1
131	87.02	3.78	14.9	100.78	142.02	27.86	4	364.91	400.3	307.1	7	2	1
132	73.87	6.51	28.16	105.87	225.25	25.47	4.43	369.76	375.37	288.5	7	2	1
133	70.42	3.08	21.94	113.49	124.68	16.7	3.4	360.62	358.9	296.1	7	2	1
134	86.95	4.33	22.45	62.16	167.48	34.2	3.69	448.13	441.4	304.6	7	2	1
135	96.51	6.18	15.64	84.45	150.12	29.65	3.81	424.37	423.8	313	7	2	1
136	108.33	4.39	27.95	2.27	19.23	1.45	2.04	388.06	381.4	315.3	14	2	1
137	97.93	4.21	21.04	1.61	17.42	1.38	2.7	405.08	395.2	319.1	14	2	1
138	105.05	4.39	21.26	5.62	53.42	2.11	0.98	353.5	387.5	303.8	14	2	1
139	92.79	16.28	41.98	4.55	31.56	1.86	1.65	439.29	434.3	302.9	14	2	1
140	101.03	7.32	28.06	3.02	25.11	1.62	2.99	402.7	397.2	319.6	14	2	1
141	69.7	7.88	38	3.52	1.44	0.71	0.27	416.83	418.06	287.6	1	3	1
142	61.59	3.86	26.58	2.91	0.28	0.19	0.2	386.86	383.17	284.8	1	3	1
143	78.23	5.53	32.67	3.15	0.6	0.69	0.26	372.54	367.78	286.6	1	3	1
144	70.06	5.48	35.26	3.45	1.43	0.12	0.2	357.83	367.18	286.4	1	3	1
145	57.98	3.38	46.2	3.01	1.35	0.79	0.26	370.78	373.38	277	1	3	1
146	75.04	8.5	31.21	4.94	4.29	0.49	1.15	382.14	375.27	300.5	3	3	1
147	44.95	3.99	23.54	3.51	2.14	0.22	1.47	380.33	384.02	290.7	3	3	1
148	53.12	3.45	22.47	2.67	1.37	0.17	1.93	343.11	340.82	303.7	3	3	1
149	49.99	8.34	27.69	8.22	30.47	1.81	1.24	379.11	373.9	288.2	3	3	1
150	54.48	8.66	54.58	6.59	19.56	1.09	0.6	405.71	400.92	283.6	3	3	1
151	59.85	8.96	24.42	45.63	45.55	9.55	2.45	413.81	412.32	297.6	7	3	1
152	109.56	5.16	18.36	52.37	90.95	7.16	0.87	411.39	412.59	291.4	7	3	1
153	82.75	4.03	8.82	48.67	58.08	9.55	1.99	444.21	452.7	291.3	7	3	1
154	100.31	4.6	12.31	38.45	92.73	7.26	1.36	371.67	391.61	309.3	7	3	1
155	64.38	7.38	29.33	37.53	96.08	7.79	1.88	351.6	345.71	304.5	7	3	1
156	47.32	8.25	38.24	22.5	91.68	10.11	3.34	387.5	411.63	297.7	14	3	1
157	53.26	5.83	15.12	13.95	45.7	7.13	0.9	381.1	386.52	297.8	14	3	1
158	54.93	3.3	26.43	16.22	48	7.62	1.07	448.9	386.06	295.3	14	3	1
159	89.4	5.64	32.17	17.45	49.35	8.34	1.19	384.61	408.88	304.8	14	3	1
160	76.41	5.17	31.75	14.7	21.96	2.44	0.51	373.3	390.28	305.1	14	3	1
161	75.2	2.99	25.51	1	1	1	1	389.69	396	319.3	1	1	1
162	62.19	4.27	25.82	1	1	1	1	368.01	360	309.3	1	1	1
163	64.61	3.91	29.78	1	1	1	1	418.52	420	312	1	1	1
164	63.32	2.56	26.79	1	1	1	1	287.06	297	303.3	1	1	1
165	51.3	7.94	26.03	1	1	1	1	431.51	427	301.2	1	1	1
166	95.84	7.84	38.47	1	1	1	1	388.74	395.1	305.7	3	1	1
167	62.19	4.48	29.78	1	1	1	1	323.64	328.3	299.9	3	1	1
168	109.39	6.3	48.34	1	1	1	1	374.31	373.3	313.1	3	1	1
169	70.97	2.99	25.06	1	1	1	1	362.69	360.2	296.5	3	1	1
170	67.64	4.48	30.23	1	1	1	1	375.78	380	314.9	3	1	1
171	100.31	4.53	13.42	1	1	1	1	333.2	335	315.7	7	1	1
172	88.92	4	10.7	1	1	1	1	383.87	397	306.2	7	1	1
173	60.12	7.22	35.07	1	1	1	1	388.99	394	305.5	7	1	1
174	108.85	4.66	17.34	1	1	1	1	386.23	387.4	324	7	1	1
175	87.5	4.36	17.68	1	1	1	1	396.93	408.4	322.6	7	1	1
176	106.47	3.91	20.44	1	1	1	1	361.19	378	301.3	14	1	1
177	98.88	3.97	22.32	1	1	1	1	303.54	330	314.1	14	1	1
178	100.78	4.39	29.32	1	1	1	1	414.44	438	330.2	14	1	1
179	53.42	2.3	22.36	1	1	1	1	328.3	381	308.5	14	1	1
180	100.31	4.01	27.77	1	1	1	1	385.25	412	310	14	1	1
